# Supplementary material
Source: PubMed Central journal article supplement (PMC8725935)
Supplement: NIHMS634857-supplement-Supp_FigureS1-S3.pdf [file NIHMS634857-supplement-Supp_FigureS1-S3.pdf]

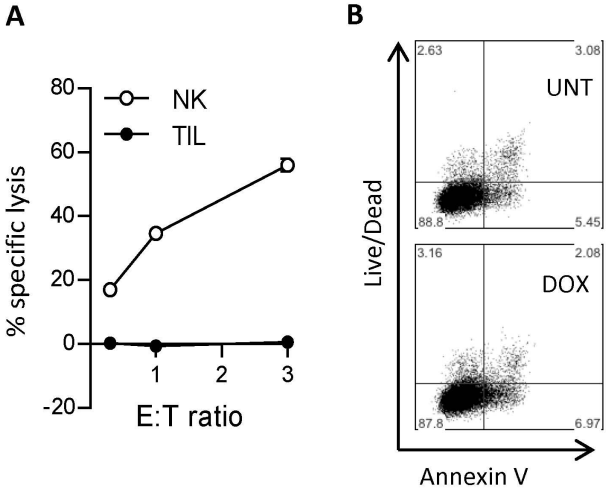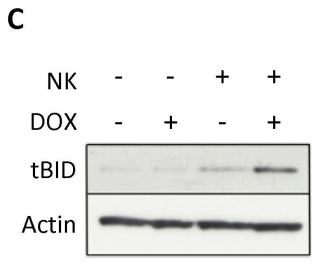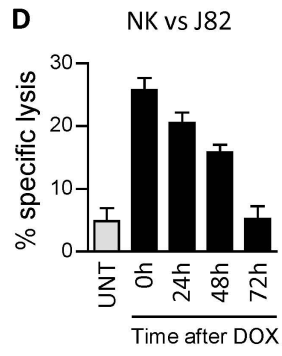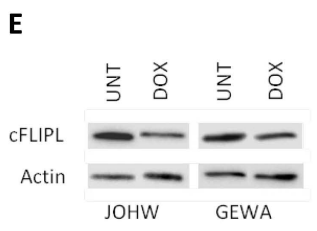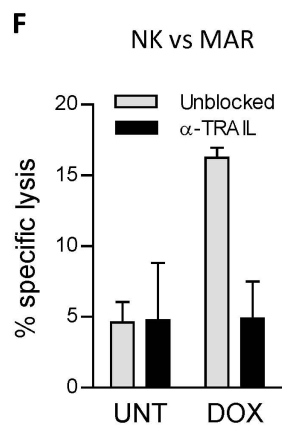

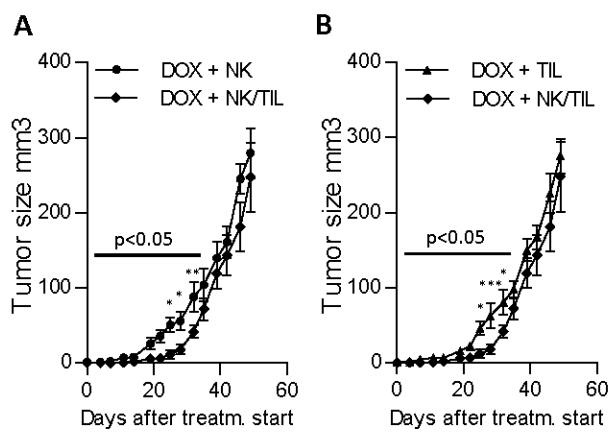

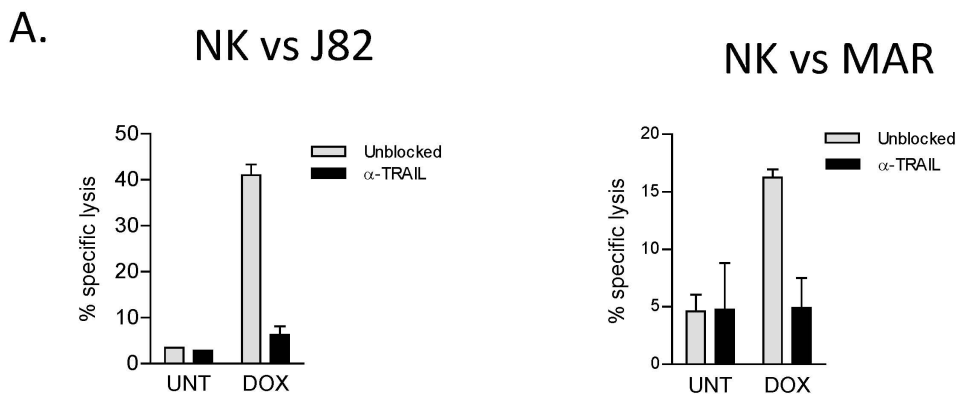

NK cell-mediated killing of J82 and MAR tumors after treatment with 200 and 250 ng/ml doxorubicin respectively. NK cells were incubated with blocking antibody against TRAIL (10  $\mu$ g/ml) 30 min prior to and during killing assay. E:T ratio = 3:1, 18h co-culture

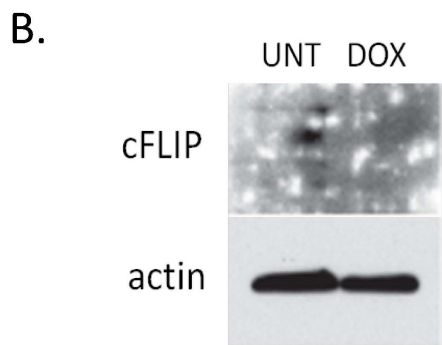

Western blot analysis of cFLIP in tumors that were grown subcutaneously in mice treated with or without doxorubicin (1 mg/kg) 24 hours prior to excision of the tumor

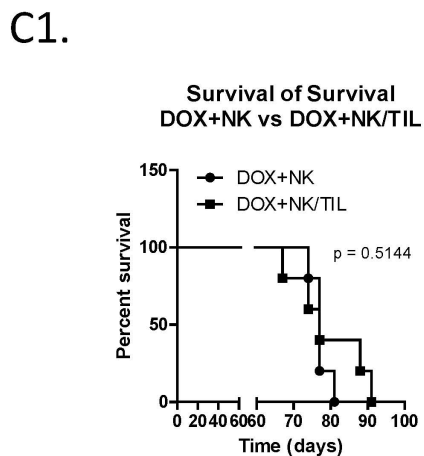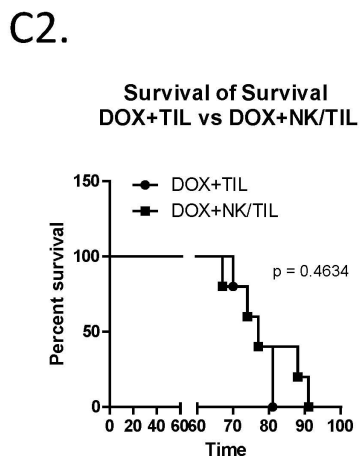

Log-rank test of survival of DOX-treated (1 mg/kg) SCID/Beige mice receiving adoptive transfer of (C1) NK cell alone or a combination of NK cells and TILs. (C2) TILs alone or a combination of NK cells and TILs.
